suggest, or an experimental artifact for which we compensate by the use of an internal standard. In addition, the data are difficult to interpret, since the authors do not report whether they measured total *chiro*-inositol (the sum of D and L optical isomers) or the desired D enantiomer. Both occur in urine.

Although not acknowledged in the paper (1), the reader should be aware that we have found increased D-*chiro*-inositol in urine from predominantly Caucasian non-insulin-dependent and insulin-dependent diabetes subjects using quantitative GC/MS techniques with an internal standard (3). Our finding is thus exactly the opposite of the authors, who reported decreased urinary levels in non-insulin-dependent diabetes patients (1,2). In our work, elevated urinary excretion of D-*chiro*-inositol by diabetic subjects was strongly related to urinary glucose, plasma glucose, and glycated hemoglobin levels. Diabetic urine contains greatly increased quantities of many polyols and sugars (4), making trace analyses very difficult without extensive pre-purification and the use of an internal standard. Thus, it is possible that the reduced urinary levels of D-*chiro*-inositol reported by the authors in diabetic subjects from both Japanese (1) and Caucasian (2) populations may have resulted from a GC/MS artifact. It would be important to resolve this question by cross-comparison of results and validation of the authors' assays. Future work published in this area should include detailed documentation of the analytical methods used.

RICHARD E. OSTLUND, JR, MD  
WILLIAM R. SHERMAN, PHD

From the Metabolism Division (R.E.O.), Department of Internal Medicine, and the Department of Psychiatry and Washington University Mass Spectrometry Resource (W.R.S.), Washington University School of Medicine, St. Louis, Missouri.

Address correspondence to Richard E. Ostlund, Jr, MD, Washington University School of Medicine, Metabolism Division Box 8127, 660 S. Euclid Ave., St. Louis, MO 63110. E-mail: rostlund@imgate.wustl.edu.

## References

1. Suzuki S, Kawasaki H, Satoh Y, Ohtomo M, Hirai M, Hirai A, Hirai S, Onoda M, Matsumoto M, Hinokio Y, Akai H, Craig J, Larner J, Toyota T: Urinary *chiro*-inositol excretion is an index marker of insulin sensitivity in Japanese type 2 diabetes. *Diabetes Care* 12:1465–1468, 1994
2. Kennington AS, Hill CR, Craig J, Bogardus C, Raz I, Ortmeier HK, Hansen BC, Romero G, Larner J: Low urinary *chiro*-inositol in non-insulin-dependent diabetes mellitus. *N Engl J Med* 323:373–378, 1990
3. Ostlund Jr RE, McGill JB, Herskowitz I, Kipnis DM, Santiago JV, Sherman WR: D-*chiro*-inositol metabolism in diabetes mellitus. *Proc Natl Acad Sci USA* 90:9988–9992, 1993
4. Pitkanen E: The serum polyol pattern and the urinary polyol excretion in diabetic and in uremic patients. *Clin Chim Acta* 38:221–230, 1972

## The Effect of Hyperglycemia on Glipizide Absorption in NIDDM Patients

Recently, it has been described that glucose-induced hyperglycemia impairs the absorption of the sulfonylurea agent glipizide in healthy young subjects (1). Therefore, the absorption and therapeutic activity of this drug in diabetic patients could be affected by metabolic state. The current study examined whether the absorption rate of glipizide in non-insulin-dependent diabetes mellitus (NIDDM) subjects would be increased following insulin-induced euglycemia.

Seven patients (five female and two male) with NIDDM who started insulin therapy because of sulfonylurea failure were studied. Their mean age was  $46.0 \pm 3.0$  years, duration of diabetes was  $13.5 \pm 4.2$  years, body mass index (BMI) was  $30.2 \pm 1.9$  kg/m<sup>2</sup>, and HbA<sub>1c</sub> was  $10.1 \pm 0.3\%$ . The existence of upper gas-

trointestinal surgery, peptic ulcer disease, or autonomic neuropathy were considered exclusion criteria. No patient had clinical signs or symptoms of renal or hepatic disease, and serum creatinine and liver enzyme levels were normal in every case. Two patients presented background retinopathy, and one patient had microalbuminuria (urinary albumin excretion: 30–300 µg/min).

The study was initiated after subjects were hospitalized for two days and received an isocaloric diet as the only diabetic treatment. Glipizide absorption was measured on two consecutive days, in hyperglycemic and euglycemic conditions, respectively. On day 1, after a sample for measurement of baseline plasma glucose and glipizide was obtained, a 5-mg tablet of glipizide was given with 200 ml of water. Thereafter, samples for measurement of plasma glucose were taken every 15 min and for plasma glipizide at 15, 45, 90, and 150 min. When plasma glucose decreased to <250 mg/dl, a 20% glucose infusion was started through a contralateral antecubital venous catheter adjusted to maintain hyperglycemia (250–350 mg/dl). After the study, insulin infusion was started to maintain the euglycemic state for 24 h (80–120 mg/dl). With the subjects in this condition, the study was repeated on day 2. Serum glipizide concentration was measured by high-performance liquid chromatography (2).

On day 1, mean blood glucose during the study was  $271 \pm 18$  mg/dl, and during the second day it was  $94 \pm 3$  mg/dl ( $P < 0.001$ ). Peak concentrations of glipizide were  $0.59 \pm 0.30$  (hyperglycemia) and  $0.77 \pm 0.20$  (euglycemia) µg/ml. During euglycemia, glipizide appeared earlier in serum ( $47 \pm 8$  vs.  $90 \pm 18$  min,  $P < 0.05$ ) (Table 1). In both glycemic conditions, a plateau of the glipizide level was achieved between 90 and 150 min after ingestion of the drug (Table 1). There was no relationship between age, duration of diabetes, HbA<sub>1c</sub>, or BMI and glipizide absorption.

Our results indicate that hyper-

**Table 1—Peak concentration ( $C_{max}$ ), time to peak concentration ( $t_{max}$ ) and time detection ( $t_{det}$ ) following a single dose of 5 mg glipizide in seven NIDDM patients, during hyperglycemia and normoglycemia**

| Patient        | $C_{max}$ ( $\mu\text{g/ml}$ ) |                | $t_{max}$ (min) |                | $t_{det}$ (min) |                |
|----------------|--------------------------------|----------------|-----------------|----------------|-----------------|----------------|
|                | Hyper-glycemia                 | Normo-glycemia | Hyper-glycemia  | Normo-glycemia | Hyper-glycemia  | Normo-glycemia |
| 1              | 542                            | 139            | 150             | 90             | 150             | 90             |
| 2              | 399                            | 1,572          | 90              | 90             | 90              | 45             |
| 3              | 239                            | 484            | 90              | 150            | 90              | 45             |
| 4              | 99                             | 415            | 150             | 45             | 150             | 45             |
| 5              | 397                            | 780            | 90              | 45             | 45              | 45             |
| 6              | 224                            | 446            | 150             | 150            | 90              | 45             |
| 7              | 1,747                          | 1,475          | 150             | 90             | 15              | 15             |
| Means $\pm$ SE | 521 $\pm$ 211                  | 758 $\pm$ 210  | 124 $\pm$ 12    | 94 $\pm$ 16    | 90 $\pm$ 18*    | 47 $\pm$ 8*    |

\*  $P < 0.05$ .

glycemia may cause a delay in the absorption of sulfonylurea drugs. The glipizide absorption rate varies greatly between subjects, probably because of differences in the rate of gastric emptying and hence in glipizide dissolution rate (3). Hyperglycemia slows gastric emptying, and this factor can modify drug absorption (4,5). The mechanisms responsible for the inhibitory action of hyperglycemia on gastric motility are not known. Alterations in gastrointestinal hormone secretion (such as motilin, pancreatic polypeptide, somatostatin, glucagon, gastrin, and gastric inhibitory polypeptide) may be important (6–8). On the other hand, hyperglycemia stimulates pyloric motility (9) and may suppress vagal nerve activity, producing an autonomic nerve dysfunction (10). According to our results, hyperglycemia per se could influence the therapeutic efficacy of the sulfonylureas, delaying their absorption and, therefore, their hypoglycemic effect in relation to the meal-induced increase of blood glucose.

ENRIC ESMATJES, MD

PAZ VINUESA, MD

PINO NAVARRO, MD

CAMINO RODRIGUEZ-VILLAR, MD

RAMON GOMIS, MD

ENRIC VILARDELL, MD

From the Endocrinology and Diabetes Unit, Hospital Clinic, University of Barcelona, Barcelona, Spain.

Address correspondence to Enric Esmatjes, MD, Endocrinology and Diabetes Unit, Hospital Clinic, C/Villarroel 170, 08036 Barcelona, Spain.

**Acknowledgments**—We wish to thank Dra. M<sup>a</sup> Antonia Arbos, Dra. Anita Novials, and Dra. Rosa Gasa for skillful technical assistance.

#### References

1. Groop LC, Luzi L, DeFronzo RA, Melander A: Hyperglycaemia and absorption of sulphonylurea drugs. *Lancet* ii:129–130, 1989
2. Wahlin-Boll E, Melander A: High performance liquid chromatographic determination of glipizide and some other sulfonylurea drugs in serum. *J Chromatogr* 164:541–546, 1979
3. Wahlin-Boll E, Almer L-O, Melander A: Bioavailability, kinetics and effects of glipizide in type 2 diabetics. *Clin Pharmacokinet* 7:363–372, 1982
4. Elias E, Gibson GT, Greenwood LF: The slowing of gastric emptying in response to starch in test meals. *J Physiol* 194:317–326, 1968
5. Macgregor IL, Gueller R, Watts HD, Meyer JH: The effect of acute hyperglycaemia on gastric emptying in man. *Gastroenterology* 70:190–196, 1976
6. Morgan LM, Tredger JA, Hampton SM, French AP, Peake JC, Marks V: The effect

of dietary modification and hyperglycaemia on gastric emptying and gastric inhibitory polypeptide (GIP) secretion. *Br J Nutr* 60:29–37, 1988

7. Barnett JL, Owyang C: Serum glucose concentration as a modulator of interdigestive gastric motility. *Gastroenterology* 94:739–744, 1988
8. Hilsted J: Pathophysiology in diabetic autonomic neuropathy: cardiovascular, hormonal and metabolic studies. *Diabetes* 31:730–737, 1982
9. Fraser R, Horowitz M, Graham S, Dent J: Acute hyperglycaemia and antro-pyloroduodenal motility in humans (Abstract). *Gastroenterology* 96:A157, 1989
10. Hirano T, Nijima A: Effects of 2-deoxyglucose, glucose and insulin efferent activity in gastric vagus nerve. *Experientia* 36:1197–1205, 1980

## Impaired Glucose Tolerance of Pregnancy by WHO and NDDG Criteria

Pettitt et al.'s article "Comparison of World Health Organization and National Diabetes Data Group procedures to detect abnormalities of glucose tolerance during pregnancy" (17:1264, 1994), is an important paper to help rationalize the diagnostic approach to gestational diabetes. However, I feel the authors may be unduly harsh on the two-step procedure (1-h screening test and then an oral glucose tolerance test). Using the World Health Organization (WHO) criteria, there are three possible outcomes after diagnostic testing: normal, impaired glucose tolerance, or diabetes. Using the formal criteria of the National Diabetes Data Group for diabetes in pregnancy, it's an all or nothing result, either normal or diabetic. Previous studies have shown that one abnormal value is of some predictive value for neonatal morbidity (1,2), and thus I think that the data on the sub-
